# Supplementary figures and images for: Drug‐refractory myasthenia gravis: Clinical characteristics, treatments, and outcome
Source: PubMed Central journal article supplement — Ann Clin Transl Neurol. 2022 Jan 26;9(2):122–31. doi: 10.1002/acn3.51492 (PMC8862423; doi:10.1002/acn3.51492), 2022-01-26

A

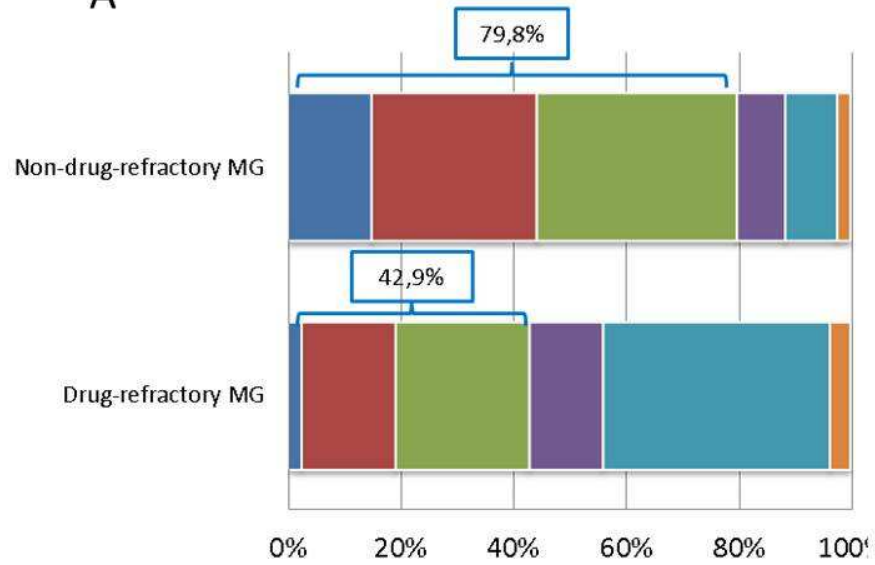

B

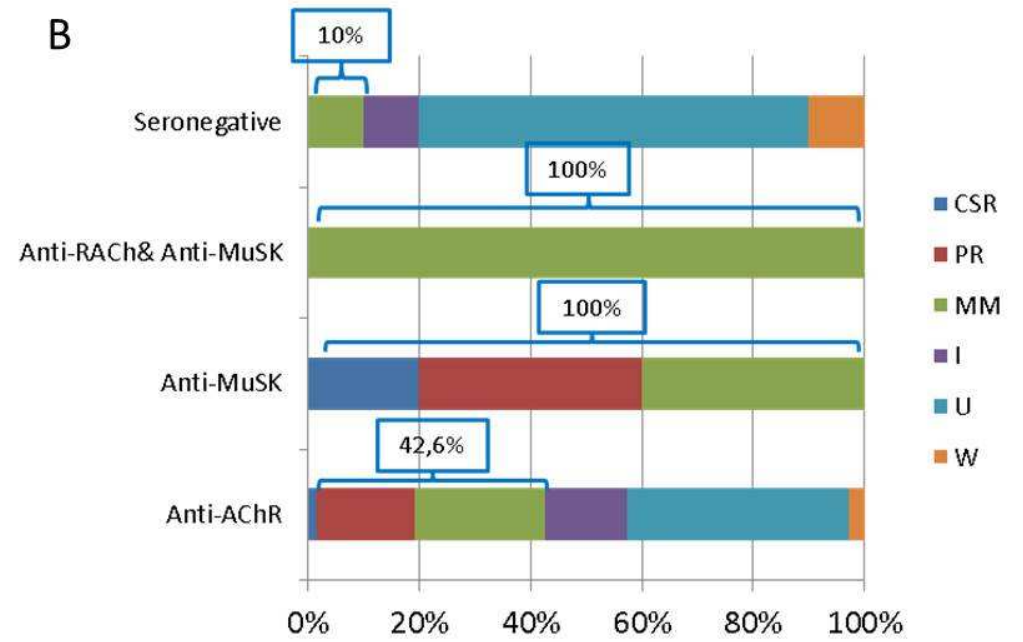

Supplement: ACN3-9-122-s001.pdf [file ACN3-9-122-s001.pdf]

A

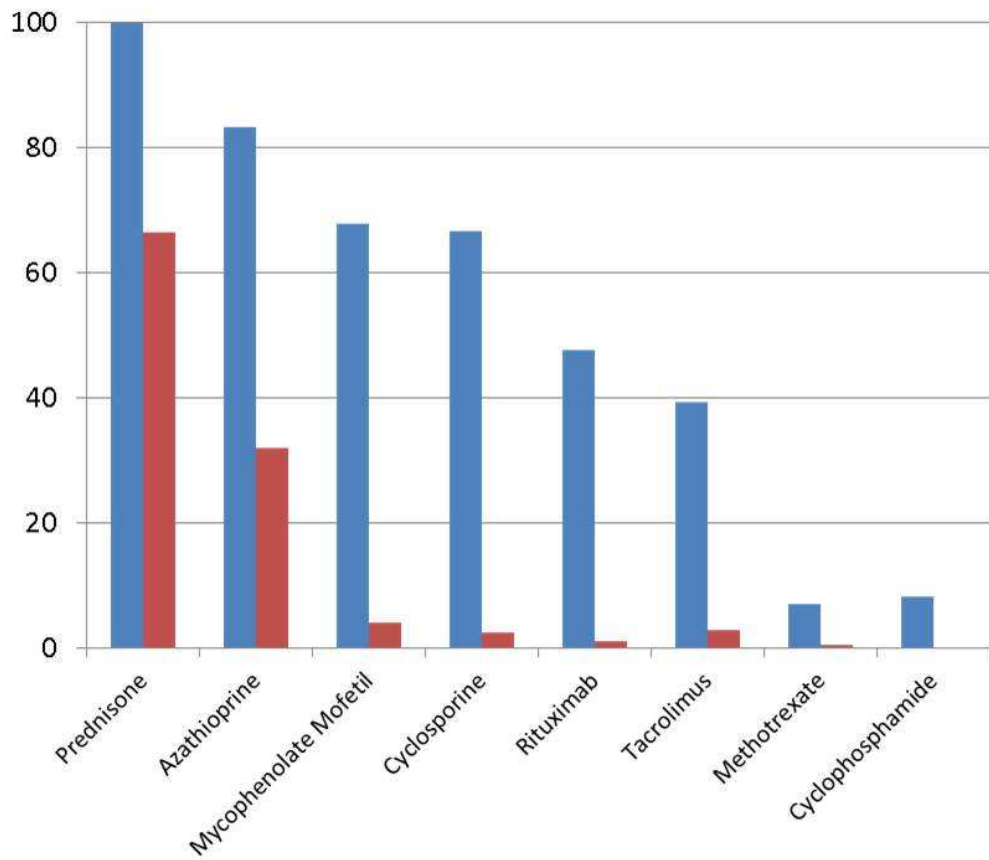

B

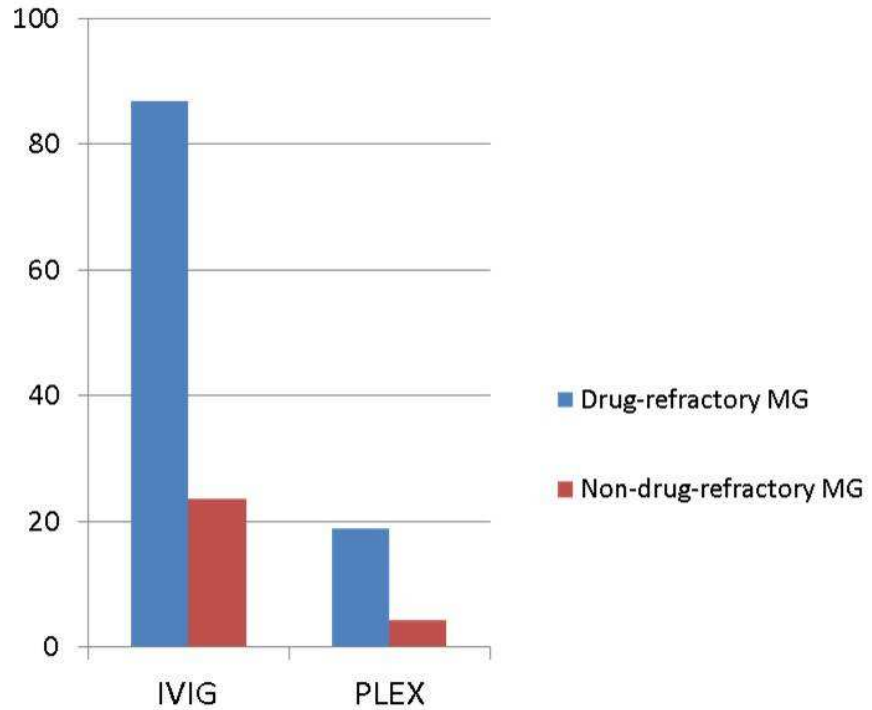

Supplement: ACN3-9-122-s002.pdf [file ACN3-9-122-s002.pdf]
